# Supplementary material for: Impact of oral metronidazole treatment on the vaginal microbiota and correlates of treatment failure
Source: PubMed Central journal article supplement (PMC6995998; doi:10.1016/j.ajog.2019.08.008), 2020-02
Supplement: mmc2.pdf [file mmc2.pdf]

**List of taxa (alphabetical order)**

|                                                                    | <b>Classification</b> | <b>Phylum/Class (Order) based on NCBI taxonomy browser</b> |
|--------------------------------------------------------------------|-----------------------|------------------------------------------------------------|
| Actinomyces funkei                                                 | BV                    | Actinobacteria/Actinobacteria (Actinomycetales)            |
| Actinomyces genus                                                  | BV                    | Actinobacteria/Actinobacteria (Actinomycetales)            |
| Actinomyces neuui                                                  | BV                    | Actinobacteria/Actinobacteria (Actinomycetales)            |
| Actinomyces urogenitalis                                           | BV                    | Actinobacteria/Actinobacteria (Actinomycetales)            |
| Aerococcus christensenii                                           | BV                    | Firmicutes/Bacilli (Lactobacillales)                       |
| Aerococcus genus                                                   | BV                    | Firmicutes/Bacilli (Lactobacillales)                       |
| Alloprevotella genus                                               | BV                    | Bacteroidetes/Bacteroidia (Bacteroidales)                  |
| Anaerococcus genus                                                 | BV                    | Firmicutes/Tissierellia (Tissierellales)                   |
| Anaerococcus hydrogenalis                                          | BV                    | Firmicutes/Tissierellia (Tissierellales)                   |
| Anaerococcus lactolyticus                                          | BV                    | Firmicutes/Tissierellia (Tissierellales)                   |
| Anaerococcus murdochii                                             | BV                    | Firmicutes/Tissierellia (Tissierellales)                   |
| Anaerococcus obesiensis                                            | BV                    | Firmicutes/Tissierellia (Tissierellales)                   |
| Anaerococcus prevotii/tetradus                                     | BV                    | Firmicutes/Tissierellia (Tissierellales)                   |
| Arcanobacterium genus                                              | BV                    | Actinobacteria/Actinobacteria (Actinomycetales)            |
| Atopobium deltae                                                   | BV                    | Actinobacteria/Coriobacteria (Coriobacteriales)            |
| Atopobium genus                                                    | BV                    | Actinobacteria/Coriobacteria (Coriobacteriales)            |
| Atopobium vaginae                                                  | BV                    | Actinobacteria/Coriobacteria (Coriobacteriales)            |
| Bacteroidales_S24-7_group family                                   | BV                    | Bacteroidetes/Bacteroidia (Bacteroidales)                  |
| Betaproteobacteria class                                           | Other                 | Betaproteobacteria                                         |
| Bifidobacterium bifidum                                            | Other                 | Actinobacteria/Actinobacteria (Bifidobacteriales)          |
| Bifidobacterium breve                                              | Other                 | Actinobacteria/Actinobacteria (Bifidobacteriales)          |
| Bifidobacterium catenulatum/kashiwanohense/<br>pseudocatenulatum   | Other                 | Actinobacteria/Actinobacteria (Bifidobacteriales)          |
| Bifidobacterium longum                                             | Other                 | Actinobacteria/Actinobacteria (Bifidobacteriales)          |
| Bulleidia genus                                                    | BV                    | Firmicutes/Erysipelotrichi (Erysipelotrichales)            |
| BVAB TM7                                                           | BV                    | Unclassified (TM7 division)                                |
| BVAB1                                                              | BV                    | Firmicutes/Clostridia (Clostridiales)                      |
| BVAB2                                                              | BV                    | Firmicutes/Clostridia (Clostridiales)                      |
| Campylobacter genus                                                | Pathobionts           | Epsilonproteobacteria (Campylobacterales)                  |
| Campylobacter hominis                                              | Pathobionts           | Epsilonproteobacteria (Campylobacterales)                  |
| Carnobacteriaceae family                                           | Other                 | Firmicutes/Bacilli (Lactobacillales)                       |
| Catenibacterium mitsuokai                                          | BV                    | Firmicutes/Erysipelotrichi (Erysipelotrichales)            |
| Catonella morbi                                                    | BV                    | Firmicutes/Clostridia (Clostridiales)                      |
| Chlamydia trachomatis                                              | Pathobionts           | Chlamydiae (Chlamydiales)                                  |
| Collinsella aerofaciens                                            | BV                    | Actinobacteria/Coriobacteria (Coriobacteriales)            |
| Coprococcus_3 comes                                                | BV                    | Firmicutes/Clostridia (Clostridiales)                      |
| Corynebacteriaceae family                                          | Other                 | Actinobacteria/Actinobacteria (Corynebacteriales)          |
| Corynebacterium atypicum                                           | Other                 | Actinobacteria/Actinobacteria (Corynebacteriales)          |
| Corynebacterium glucuronolyticum                                   | Other                 | Actinobacteria/Actinobacteria (Corynebacteriales)          |
| Corynebacterium jeikeium                                           | Other                 | Actinobacteria/Actinobacteria (Corynebacteriales)          |
| Corynebacterium minutissimum/singulare                             | Other                 | Actinobacteria/Actinobacteria (Corynebacteriales)          |
| Corynebacterium pyruviciproducens                                  | Other                 | Actinobacteria/Actinobacteria (Corynebacteriales)          |
| Corynebacterium_1 amycolatum/jeikeium/<br>urealyticum/vitaeruminis | Other                 | Actinobacteria/Actinobacteria (Corynebacteriales)          |
| Corynebacterium_1 aurimucosum                                      | Other                 | Actinobacteria/Actinobacteria (Corynebacteriales)          |

| List of taxa (alphabetical order)                                                                                 | Classification | Phylum/Class (Order) based on NCBI taxonomy browser |
|-------------------------------------------------------------------------------------------------------------------|----------------|-----------------------------------------------------|
| Corynebacterium_1 aurimucosum/minutissimum                                                                        | Other          | Actinobacteria/Actinobacteria (Corynebacteriales)   |
| Corynebacterium_1 aurimucosum/pseudogenitalium/tuberculostearicum                                                 | Other          | Actinobacteria/Actinobacteria (Corynebacteriales)   |
| Corynebacterium_1 aurimucosum/simulans/striatum/xerosis                                                           | Other          | Actinobacteria/Actinobacteria (Corynebacteriales)   |
| Corynebacterium_1 coyleae                                                                                         | Other          | Actinobacteria/Actinobacteria (Corynebacteriales)   |
| Corynebacterium_1 genus                                                                                           | Other          | Actinobacteria/Actinobacteria (Corynebacteriales)   |
| Corynebacterium_1 minutissimum                                                                                    | Other          | Actinobacteria/Actinobacteria (Corynebacteriales)   |
| Corynebacterium_1 pseudogenitalium                                                                                | Other          | Actinobacteria/Actinobacteria (Corynebacteriales)   |
| Corynebacterium_1 riegellii                                                                                       | Other          | Actinobacteria/Actinobacteria (Corynebacteriales)   |
| Corynebacterium_1 tuscaniense                                                                                     | Other          | Actinobacteria/Actinobacteria (Corynebacteriales)   |
| Delftia acidovorans/lacustris/tsuruhatensis                                                                       | Other          | Betaproteobacteria (Burkholderiales)                |
| Dermabacter hominis                                                                                               | Other          | Actinobacteria/Actinobacteria (Micrococcales)       |
| Dermabacter jinjuensis                                                                                            | Other          | Actinobacteria/Actinobacteria (Micrococcales)       |
| Dialister genus                                                                                                   | BV             | Firmicutes/Negativicutes (Veillonellales)           |
| Dialister micraerophilus/microaerophilus                                                                          | BV             | Firmicutes/Negativicutes (Veillonellales)           |
| Dialister propionicifaciens                                                                                       | BV             | Firmicutes/Negativicutes (Veillonellales)           |
| Enterococcus azikeevi/durans/faecalis/faecium/hirae/lactis/mundtii/raffinosis/ratti/rivorum/thailandicus/villorum | Pathobionts    | Firmicutes/Bacilli (Lactobacillales)                |
| Enterococcus durans/faecalis/faecium                                                                              | Pathobionts    | Firmicutes/Bacilli (Lactobacillales)                |
| Enterococcus faecalis                                                                                             | Pathobionts    | Firmicutes/Bacilli (Lactobacillales)                |
| Enterococcus faecium                                                                                              | Pathobionts    | Firmicutes/Bacilli (Lactobacillales)                |
| Escherichia/Shigella genus                                                                                        | Pathobionts    | Gammaproteobacteria (Enterobacterales)              |
| Ezakiella genus                                                                                                   | BV             | Firmicutes/Tissierellia (unclassified Tissierellia) |
| Facklamia hominis                                                                                                 | BV             | Firmicutes/Bacilli (Lactobacillales)                |
| Faecalibacterium genus                                                                                            | BV             | Firmicutes/Clostridia (Clostridiales)               |
| Faecalibacterium prausnitzii                                                                                      | BV             | Firmicutes/Clostridia (Clostridiales)               |
| Family_XI family                                                                                                  | Other          | Cyanobacteria (order not described)                 |
| Family_XIII family                                                                                                | Other          | Cyanobacteria (order not described)                 |
| Family_XIII_UCG-001 genus                                                                                         | Other          | Cyanobacteria (order not described)                 |
| Fastidiosipila genus                                                                                              | BV             | Firmicutes/Clostridia (Clostridiales)               |
| Fenollaria massiliensis strain DNF00604                                                                           | BV             | Firmicutes/Clostridia (Clostridiales)               |
| Fingoldia genus                                                                                                   | BV             | Firmicutes/Tissierellia (Tissierellales)            |
| Fingoldia magna                                                                                                   | BV             | Firmicutes/Tissierellia (Tissierellales)            |
| Fusobacterium equinum/gonidiaformans                                                                              | BV             | Fusobacteria/Fusobacteriia (Fusobacteriales)        |
| Fusobacterium genus                                                                                               | BV             | Fusobacteria/Fusobacteriia (Fusobacteriales)        |
| Fusobacterium nucleatum                                                                                           | BV             | Fusobacteria/Fusobacteriia (Fusobacteriales)        |
| Gardnerella genus                                                                                                 | BV             | Actinobacteria/Actinobacteria (Bifidobacteriales)   |
| Gardnerella vaginalis                                                                                             | BV             | Actinobacteria/Actinobacteria (Bifidobacteriales)   |
| Gemella asaccharolytica                                                                                           | BV             | Firmicutes/Bacilli (Bacillales)                     |
| Gemella genus                                                                                                     | BV             | Firmicutes/Bacilli (Bacillales)                     |
| Gemella haemolysans/sanguinis/taiwanensis                                                                         | BV             | Firmicutes/Bacilli (Bacillales)                     |
| Gemella parahaemolysans                                                                                           | BV             | Firmicutes/Bacilli (Bacillales)                     |
| Granulicatella elegans                                                                                            | BV             | Firmicutes/Bacilli (Lactobacillales)                |

| List of taxa (alphabetical order)                                    | Classification | Phylum/Class (Order) based on NCBI taxonomy browser |
|----------------------------------------------------------------------|----------------|-----------------------------------------------------|
| Granulicatella genus                                                 | BV             | Firmicutes/Bacilli (Lactobacillales)                |
| Haemophilus genus                                                    | Pathobionts    | Gammaproteobacteria (Pasteurellales)                |
| Haemophilus haemolyticus/influenzae                                  | Pathobionts    | Gammaproteobacteria (Pasteurellales)                |
| Haemophilus haemolyticus/influenzae/quentini                         | Pathobionts    | Gammaproteobacteria (Pasteurellales)                |
| Haemophilus influenzae/parainfluenzae                                | Pathobionts    | Gammaproteobacteria (Pasteurellales)                |
| Haemophilus parainfluenzae                                           | Pathobionts    | Gammaproteobacteria (Pasteurellales)                |
| Howardella genus                                                     | BV             | Firmicutes/Clostridia (Clostridiales)               |
| Klebsiella oxytoca/pneumoniae/variicola                              | Pathobionts    | Gammaproteobacteria (Enterobacterales)              |
| Lachnospiraceae family                                               | BV             | Firmicutes/Clostridia (Clostridiales)               |
| Lachnospiraceae_FE2018_group genus                                   | BV             | Firmicutes/Clostridia (Clostridiales)               |
| Lactobacillus brevis W63                                             | Lactobacilli   | Firmicutes/Bacilli (Lactobacillales)                |
| Lactobacillus coleohominis                                           | Lactobacilli   | Firmicutes/Bacilli (Lactobacillales)                |
| Lactobacillus crispatus/acidophilus/casei/gallinarum                 | Lactobacilli   | Firmicutes/Bacilli (Lactobacillales)                |
| Lactobacillus crispatus/gasseri/helveticus/johnsonii/kefiranofaciens | Lactobacilli   | Firmicutes/Bacilli (Lactobacillales)                |
| Lactobacillus fermentum                                              | Lactobacilli   | Firmicutes/Bacilli (Lactobacillales)                |
| Lactobacillus fermentum/curieae/delbrueckii/ingluviei/oris/plantarum | Lactobacilli   | Firmicutes/Bacilli (Lactobacillales)                |
| Lactobacillus fermentum/gasseri/reuteri/vaginalis                    | Lactobacilli   | Firmicutes/Bacilli (Lactobacillales)                |
| Lactobacillus fermentum/mucosae                                      | Lactobacilli   | Firmicutes/Bacilli (Lactobacillales)                |
| Lactobacillus fornicalis/jensenii                                    | Lactobacilli   | Firmicutes/Bacilli (Lactobacillales)                |
| Lactobacillus gasseri                                                | Lactobacilli   | Firmicutes/Bacilli (Lactobacillales)                |
| Lactobacillus genus                                                  | Lactobacilli   | Firmicutes/Bacilli (Lactobacillales)                |
| Lactobacillus iatae/johnsonii/taiwanensis                            | Lactobacilli   | Firmicutes/Bacilli (Lactobacillales)                |
| Lactobacillus iners                                                  | Lactobacilli   | Firmicutes/Bacilli (Lactobacillales)                |
| Lactobacillus jensenii                                               | Lactobacilli   | Firmicutes/Bacilli (Lactobacillales)                |
| Lactobacillus johnsonii/prophage/taiwanensis                         | Lactobacilli   | Firmicutes/Bacilli (Lactobacillales)                |
| Lactobacillus johnsonii/taiwanensis/gasseri                          | Lactobacilli   | Firmicutes/Bacilli (Lactobacillales)                |
| Lactobacillus mucosae                                                | Lactobacilli   | Firmicutes/Bacilli (Lactobacillales)                |
| Lactobacillus plantarum W21                                          | Lactobacilli   | Firmicutes/Bacilli (Lactobacillales)                |
| Lactobacillus reuteri                                                | Lactobacilli   | Firmicutes/Bacilli (Lactobacillales)                |
| Lactobacillus ruminis                                                | Lactobacilli   | Firmicutes/Bacilli (Lactobacillales)                |
| Lactobacillus salivarius                                             | Lactobacilli   | Firmicutes/Bacilli (Lactobacillales)                |
| Lactobacillus vaginalis                                              | Lactobacilli   | Firmicutes/Bacilli (Lactobacillales)                |
| Lactobacillus vaginalis/reuteri                                      | Lactobacilli   | Firmicutes/Bacilli (Lactobacillales)                |
| Lawsonella clevelandensis                                            | Other          | Actinobacteria/Actinobacteria (Corynebacteriales)   |
| Lawsonella genus                                                     | Other          | Actinobacteria/Actinobacteria (Corynebacteriales)   |
| Mageeibacillus indolicus (formerly BVAB3)                            | BV             | Firmicutes/Clostridia (Clostridiales)               |
| Megasphaera genus                                                    | BV             | Firmicutes/Negativicutes (Veillonellales)           |
| Micrococcaceae family                                                | Other          | Actinobacteria/Actinobacteria (Micrococcales)       |
| Mobiluncus curtisii                                                  | BV             | Actinobacteria/Actinobacteria (Actinomycetales)     |
| Mobiluncus genus                                                     | BV             | Actinobacteria/Actinobacteria (Actinomycetales)     |
| Mobiluncus mulieris                                                  | BV             | Actinobacteria/Actinobacteria (Actinomycetales)     |
| Moryella genus                                                       | BV             | Firmicutes/Clostridia (Clostridiales)               |
| Moryella indoligenes                                                 | BV             | Firmicutes/Clostridia (Clostridiales)               |

| <b>List of taxa (alphabetical order)</b>        | <b>Classification</b> | <b>Phylum/Class (Order) based on NCBI taxonomy browser</b> |
|-------------------------------------------------|-----------------------|------------------------------------------------------------|
| Murdochiella asaccharolytica                    | BV                    | Firmicutes/Tissierellia (Tissierellales)                   |
| Mycoplasma genus                                | BV                    | Tenericutes/Mollicutes (Mycoplasmatales)                   |
| Mycoplasma hominis                              | BV                    | Tenericutes/Mollicutes (Mycoplasmatales)                   |
| Mycoplasmataceae family                         | BV                    | Tenericutes/Mollicutes (Mycoplasmatales)                   |
| Negativicoccus genus                            | BV                    | Firmicutes/Negativicutes (Veillonellales)                  |
| Neisseria genus                                 | Pathobionts           | Betaproteobacteria (Neisseriales)                          |
| Neisseria gonorrhoeae/meningitidis              | Pathobionts           | Betaproteobacteria (Neisseriales)                          |
| Olsenella genus                                 | BV                    | Actinobacteria/Coriobacteriia (Coriobacteriales)           |
| Paeniglutamibacter genus                        | Other                 | Actinobacteria/Actinobacteria (Micrococcales)              |
| Parvimonas genus                                | BV                    | Firmicutes/Tissierellia (Tissierellales)                   |
| Parvimonas micra                                | BV                    | Firmicutes/Tissierellia (Tissierellales)                   |
| Peptococcus genus                               | BV                    | Firmicutes/Clostridia (Clostridiales)                      |
| Peptoniphilus asaccharolyticus/grossensis/harei | BV                    | Firmicutes/Tissierellia (Tissierellales)                   |
| Peptoniphilus coxii                             | BV                    | Firmicutes/Tissierellia (Tissierellales)                   |
| Peptoniphilus duerdenii                         | BV                    | Firmicutes/Tissierellia (Tissierellales)                   |
| Peptoniphilus genus                             | BV                    | Firmicutes/Tissierellia (Tissierellales)                   |
| Peptoniphilus gorbachii/rhinitidis              | BV                    | Firmicutes/Tissierellia (Tissierellales)                   |
| Peptoniphilus lacrimalis                        | BV                    | Firmicutes/Tissierellia (Tissierellales)                   |
| Peptoniphilus massiliensis                      | BV                    | Firmicutes/Tissierellia (Tissierellales)                   |
| Peptostreptococcaceae family                    | BV                    | Firmicutes/Clostridia (Clostridiales)                      |
| Peptostreptococcus anaerobius                   | BV                    | Firmicutes/Clostridia (Clostridiales)                      |
| Peptostreptococcus genus                        | BV                    | Firmicutes/Clostridia (Clostridiales)                      |
| Phascolarctobacterium genus                     | BV                    | Firmicutes/Negativicutes (Acidaminococcales)               |
| Porphyromonas genus                             | BV                    | Bacteroidetes/Bacteroidia (Bacteroidales)                  |
| Porphyromonas uenonis                           | BV                    | Bacteroidetes/Bacteroidia (Bacteroidales)                  |
| Prevotella amnii                                | BV                    | Bacteroidetes/Bacteroidia (Bacteroidales)                  |
| Prevotella bivia                                | BV                    | Bacteroidetes/Bacteroidia (Bacteroidales)                  |
| Prevotella bivia/denticola                      | BV                    | Bacteroidetes/Bacteroidia (Bacteroidales)                  |
| Prevotella buccalis                             | BV                    | Bacteroidetes/Bacteroidia (Bacteroidales)                  |
| Prevotella disiens                              | BV                    | Bacteroidetes/Bacteroidia (Bacteroidales)                  |
| Prevotella genus                                | BV                    | Bacteroidetes/Bacteroidia (Bacteroidales)                  |
| Prevotella intermedia                           | BV                    | Bacteroidetes/Bacteroidia (Bacteroidales)                  |
| Prevotella melaninogenica                       | BV                    | Bacteroidetes/Bacteroidia (Bacteroidales)                  |
| Prevotella timonensis                           | BV                    | Bacteroidetes/Bacteroidia (Bacteroidales)                  |
| Prevotella_6 corporis                           | BV                    | Bacteroidetes/Bacteroidia (Bacteroidales)                  |
| Prevotellaceae family                           | BV                    | Bacteroidetes/Bacteroidia (Bacteroidales)                  |
| Propionimicrobium genus                         | Other                 | Actinobacteria/Actinobacteria (Propionibacteriales)        |
| Prevotella colorans                             | BV                    | Bacteroidetes/Bacteroidia (Bacteroidales)                  |
| Proteobacteria phylum                           | Other                 | Proteobacteria                                             |
| Raoultella genus                                | Pathobionts           | Gammaproteobacteria (Enterobacterales)                     |
| Rickettsiales_Incertae_Sedis family             | Pathobionts           | Alphaproteobacteria (Rickettsiales)                        |
| Rikenellaceae_RC9_gut_group genus               | BV                    | Bacteroidetes/Bacteroidia (Bacteroidales)                  |
| Roseburia genus                                 | BV                    | Firmicutes/Clostridia (Clostridiales)                      |
| Ruminococcaceae family                          | BV                    | Firmicutes/Clostridia (Clostridiales)                      |

| List of taxa (alphabetical order)                                                                                     | Classification | Phylum/Class (Order) based on NCBI taxonomy browser |
|-----------------------------------------------------------------------------------------------------------------------|----------------|-----------------------------------------------------|
| Ruminococcaceae_UCG-014 genus                                                                                         | BV             | Firmicutes/Clostridia (Clostridiales)               |
| Saccharibacteria phylum                                                                                               | BV             | Unclassified (TM7 division)                         |
| Senegalimassilia genus                                                                                                | BV             | Actinobacteria/Coriobacteriia (Coriobacteriales)    |
| Shuttleworthia genus                                                                                                  | BV             | Firmicutes/Clostridia (Clostridiales)               |
| Slackia exigua                                                                                                        | BV             | Actinobacteria/Coriobacteriia (Eggerthellales)      |
| Sneathia amnii                                                                                                        | BV             | Fusobacteria/Fusobacteriia (Fusobacteriales)        |
| Sneathia amnii/sanguinegens                                                                                           | BV             | Fusobacteria/Fusobacteriia (Fusobacteriales)        |
| Sneathia genus                                                                                                        | BV             | Fusobacteria/Fusobacteriia (Fusobacteriales)        |
| Sneathia sanguinegens                                                                                                 | BV             | Fusobacteria/Fusobacteriia (Fusobacteriales)        |
| SR1_(Absconditabacteria) phylum                                                                                       | BV             | Unclassified (Absconditabacteria division)          |
| Staphylococcus                                                                                                        | Pathobionts    | Firmicutes/Bacilli (Bacillales)                     |
| Staphylococcus aureus/devriesei/epidermidis/haemolyticus                                                              | Pathobionts    | Firmicutes/Bacilli (Bacillales)                     |
| Staphylococcus epidermidis/haemolyticus                                                                               | Pathobionts    | Firmicutes/Bacilli (Bacillales)                     |
| Staphylococcus epidermidis/haemolyticus/hominis                                                                       | Pathobionts    | Firmicutes/Bacilli (Bacillales)                     |
| Staphylococcus genus                                                                                                  | Pathobionts    | Firmicutes/Bacilli (Bacillales)                     |
| Staphylococcus haemolyticus                                                                                           | Pathobionts    | Firmicutes/Bacilli (Bacillales)                     |
| Staphylococcus haemolyticus/petrasii                                                                                  | Pathobionts    | Firmicutes/Bacilli (Bacillales)                     |
| Streptococcus agalactiae/pyogenes                                                                                     | Pathobionts    | Firmicutes/Bacilli (Lactobacillales)                |
| Streptococcus alactolyticus/equinus/gallolyticus/<br>macedonicus/pasteuri/pasteurianus                                | Pathobionts    | Firmicutes/Bacilli (Lactobacillales)                |
| Streptococcus anginosus/milleri                                                                                       | Pathobionts    | Firmicutes/Bacilli (Lactobacillales)                |
| Streptococcus dentisani/infantis/mitis/<br>oligofermentans/oralis/pneumoniae/<br>pseudopneumoniae/sanguinis/tigurinus | Pathobionts    | Firmicutes/Bacilli (Lactobacillales)                |
| Streptococcus equinus/infantarius/lutetiensis                                                                         | Pathobionts    | Firmicutes/Bacilli (Lactobacillales)                |
| Streptococcus genus                                                                                                   | Pathobionts    | Firmicutes/Bacilli (Lactobacillales)                |
| Sutterella genus                                                                                                      | Other          | Betaproteobacteria (Burkholderiales)                |
| Sutterella morbirenis/sanguinus                                                                                       | Other          | Betaproteobacteria (Burkholderiales)                |
| Ureaplasma genus                                                                                                      | BV             | Tenericutes/Mollicutes (Mycoplasmatales)            |
| Ureaplasma parvum/urealyticum                                                                                         | BV             | Tenericutes/Mollicutes (Mycoplasmatales)            |
| Ureaplasma urealyticum                                                                                                | BV             | Tenericutes/Mollicutes (Mycoplasmatales)            |
| Varibaculum cambriense                                                                                                | BV             | Actinobacteria/Actinobacteria (Actinomycetales)     |
| Varibaculum genus                                                                                                     | BV             | Actinobacteria/Actinobacteria (Actinomycetales)     |
| Veillonella dispar                                                                                                    | BV             | Firmicutes/Negativicutes (Veillonellales)           |
| Veillonella genus                                                                                                     | BV             | Firmicutes/Negativicutes (Veillonellales)           |
| Veillonella montpellierensis                                                                                          | BV             | Firmicutes/Negativicutes (Veillonellales)           |
